1 **Exploring differentially expressed key genes related to development of follicle by**  
2 **RNA-seq in Peking ducks (*Anas Platyrhynchos*)**

3 Jindong Ren<sup>a</sup>, Changsen Sun<sup>a</sup>, Li Chen<sup>b</sup>, Jianhong Hu<sup>c</sup>, Xuetao Huang<sup>b</sup>, Xiaolin Liu<sup>c,\*</sup>  
4 and Lizhi Lu<sup>b,\*</sup>

5 <sup>a</sup> School of Life Science, Taizhou University, Taizhou, Zhejiang, 318000, People's  
6 Republic of China

7 <sup>b</sup> Zhejiang Academy of Agricultural Sciences, Hangzhou, Zhejiang 310021, People's  
8 Republic of China

9 <sup>c</sup> College of Animal Science and Technology, Northwest Agriculture and Forestry  
10 University, Yangling, Shaanxi 712100, People's Republic of China

11 \* Correspondence address: Liuxiaolin@nwfau.edu.cn; Lulizhibox@163.com.

12  
13 **Abstract:** Duck follicle enter different reproductive phases throughout life, and follicle  
14 gene expression patterns differ according to these phases. In particular, differentially  
15 expressed genes and related to development of follicle (mRNAs) play an important role  
16 to explore the key genes in this process; however, the expression profiles of these genes  
17 remain unclear. In this study, transcriptome sequencing was used to investigate the  
18 expression levels of duck ovarian genes, and comparative transcriptional analysis was  
19 carried out to identify differential genes, cluster them into groups and function  
20 identification. The results showed differential expression of 593 coding genes between  
21 young and laying ducks, and of 518 coding genes between laying and old ducks. In further  
22 GO analysis, 35 genes from the comparison between old ducks and laying ducks have  
23 significant been changed involved in hormones related to follicle development. They  
24 include up-regulated genes StAR, CYP17, EPOX, 3 $\beta$ -HSD, CYP1B1 CYP19A1 and  
25 down-regulated genes SR-B1 in laying ducks hormone synthesis than old ducks. Among  
26 which EPOX is a key gene for time special highly expression during egg laying stage,  
27 and other key regulatory genes' highly expression showed in young and laying stage and  
28 lower expression showing with follicular development stopping. Therefore, EPOX is key

29 regulator for duck follicle development in laying period, when its expression level  
30 decrease 98% the follicular development will stopping in duck life cycle.

31 **Keywords:** differentially expression; follicle development; function analysis

32

### 33 INTRODUCTION

34 Maintenance of the physiological status of ovaries at different times requires serial  
35 specific genes and some biology molecular, such as regulation element function protein.  
36 For egg-laying poultry, the ovary follicle is characterized by three life phases: the growth  
37 phase, laying phase, and maternity phase. During the growth period, the primordial  
38 follicle is assembled and prepared for egg-laying at sexual maturation, and remains in a  
39 quiescent state [1]. During the egg-laying period, the follicle is activated and ovulation  
40 becomes the main activity of the ovary, regulated by the secretion of sex hormones [2].  
41 In contrast to the egg-laying period, most reproductive activities cease during the  
42 maternity phase, including the secretion of sexual hormones. The presence of three  
43 contrasting ovary phases in poultry indicates that different genes associated with each  
44 phase are expressed differentially in clusters. The present study aimed to identify these  
45 differentially expressed gene clusters and their function to provide a molecular-level  
46 understanding of the different developmental phases evident in duck ovaries.

47 The follicle in ovary of poultry develop dynamically throughout life, beginning at  
48 gametogenesis. During the multiplicative phase, the assembly of the primordial follicles  
49 is completed [3]. Throughout this process, most primordial follicles are approximately  
50 0.05 mm in diameter and remain in a quiescent state until sexual maturation [1, 4]; a  
51 special characteristic of this phase is a change in the shape of granulosa cells from flat to  
52 cuboidal. The gene promoting the transition from quiescence to slow growing follicles is  
53 yet to be investigated in poultry; however, the anti-Mullerian hormone (AMH) and KIT-  
54 ligand have been identified as potential factors in the analogous transition in mammals  
55 [5-7]. After the multiplicative phase, the ovary begins follicular development in the egg-  
56 laying period. During this period, the pulsatile secretion of gonadotropin-releasing

57 hormone (GnRH) stimulates the pituitary gonadotropin secretion [1], and causing  
58 follicles to be selected to enter the follicle hierarchy. As in mammals, follicle stimulating  
59 hormone (FSH) is an important factor in the development of pre-hierarchical follicles in  
60 poultry [8], and it induces follicular selection [9]. Although the signal pathway of FSH is  
61 known, the precise role of FSH is unclear, especially in the transition from the egg-laying  
62 phase to the post-laying phase. Clock genes, such as *BMAL1-CLOCK* (Brain and Muscle  
63 ARNT-like-1), are the only genes involved in phase transitions investigated to date [10].  
64 However, the mechanism underlying the regulation of transition by the clock genes is  
65 unclear [11-12], and which signal path play a key function in follicle development and  
66 change that also is unclear, in previously.

67 Therefore, in this study, we identified and quantified genes from duck follicle in three  
68 life stages, to identify the potential key genes involved in transitions between the stages  
69 by comparing differential gene expression profiles in the three phases, and by examining  
70 molecular markers that may be important for egg laying in ducks.

71

## 72 **MATERIALS AND METHODS**

### 73 **Ethics statement**

74 The protocol for the care and slaughter of experimental ducks was approved by the  
75 Institutional Animal Care and Use Committee of the Northwest Agriculture and Forestry  
76 University, and carried out in accordance with the Regulations for the Administration of  
77 Affairs Concerning Experimental Animals (China, 1988). All protocols were carried out  
78 according to recommendations proposed by the Animal welfare European Commission  
79 (1997), and all efforts were made to minimize the suffering of experimental ducks.

80

### 81 **Tissue sampling and RNA preparation**

82 Ovary follicle samples were collected from the Zhongwang Beijing Duck Breeding  
83 Farm (Huzhou, China). Three birds each from three different age groups (60 day old  
84 young ducks, YD; 160 day old first-laying ducks, FL; and 490 day old stop-laying ducks,

85 OD) were slaughtered for tissue sampling. Fresh ovary follicle samples were washed in  
86 phosphate-buffered saline (PBS; Gibco, Fisher Scientific, Waltham, MA, USA) and  
87 immediately frozen in liquid nitrogen. Total RNA was extracted from each sample using  
88 an Agilent 2100 RNA Nano 6000 Assay Kit (Agilent Technologies, Santa Clara, CA,  
89 USA). RNA concentration and purity was determined using a spectrophotometer to  
90 investigate the OD260/OD280 of sample (NanoVue; GE Healthcare, Piscataway, NJ,  
91 USA).

92

### 93 Sequencing and assembly of expressed genes

94 A total quantity of 3 µg RNA per sample was used as initial material for RNA sample  
95 preparation. Ribosomal RNA was extracted using an Epicentre Ribo-Zero™ Gold Kit  
96 (Epicentre Technologies, Madison, WI, USA) and was used to generate sequencing  
97 libraries with varied index label using a NEBNextUltra™ Directional RNA Library Prep  
98 Kit for Illumina (New England BioLabs, Ipswich, MA, USA) according to the  
99 manufacturer's instructions. The clustering of index-coded samples was carried out on a  
100 cBot cluster generation system using TruSeq PE Cluster Kit v3-cBot-HS (Illumina, San  
101 Diego, CA, USA) according to manufacturer's instructions. After cluster generation, the  
102 libraries were sequenced on an Illumina HiSeq 4000 platform (Illumina, San Diego, CA,  
103 USA) and 150 bp paired-end reads were generated. Clean data were obtained by filtering  
104 the raw reads and removing polluted reads, low-quality reads, and reads with unknown  
105 bases, accounting for more than 5% of total genomic material. Filtered reads were aligned  
106 to the duck genome using TopHat version 2.0.12 [13] and mapped with Bowtie 2 version  
107 2.2.3 [14].

108 .

109

### 110 Quantification of gene expression levels and differential analysis

111 The number of clean reads per gene per sample was counted using HTSeq version 0.6.0  
112 [15]. Reads per kilobase per million mapped reads (RPKM) were calculated to estimate

113 the expression level of genes in each sample using the formula  $RPKM = \frac{10^6 * R}{N * L / 10^3}$ , where

114  $R$  is the number of reads in a sample assigned to a gene,  $N$  is the total number of mapped  
115 reads in the sample, and  $L$  is the length of the gene [16].

116 Pairwise analyses of differential gene expression were carried out with biological  
117 replicates using DEGseq version 1.16. The gene expression levels were determined using  
118 a negative binomial distribution model, and genes with  $q \leq 0.05$  and  $|\log_2\text{ratio}| \geq 1$  were  
119 identified as differentially expressed genes (DEGs) [17]. The expression levels of all  
120 divergent genes were log2-transformed, the Euclidean distance was calculated, and  
121 clustering was performed using Hierarchical Cluster methods in R software (version  
122 3.2.5).

123

124 GO and KEGG enrichment analysis of DEGs

125 The GO (Gene Ontology, <http://geneontology.org/>) enrichment of DEGs was  
126 implemented by the hypergeometric test, in which p-value is calculated and adjusted as  
127 q-value, and data background is genes in the whole genome. GO terms with  $q < 0.05$  were  
128 considered to be significantly enriched [18].

129 KEGG (Kyoto Encyclopedia of Genes and Genomes, <http://www.kegg.jp/>) enrichment  
130 of DEGs was implemented by the hypergeometric test, in which p-value was adjusted by  
131 multiple comparisons as q-value. KEGG terms with  $q < 0.05$  were considered to be  
132 significantly enriched [19].

133

134

## 135 **RESULTS**

136 Differentially expressed genes

137 High-throughput sequencing technology was used to analyze the gene expression  
138 profiles of ovary follicle tissue from the three sampled life stages. Reads of each RNA  
139 sample from the three groups were identified and annotated based on available duck

140 genomic data. This assembly identified 15576 genes. The reads for each gene were used  
141 to calculate its expression level, as indicated by RPKM. Based on the significance values,  
142 593 and 518 differentially expressed genes were detected in the comparative analyses  
143 between FL and YD, and OD and FL, respectively.

144

#### 145 Divergent gene clusters

146 The expression levels of the divergent genes identified in pairwise comparisons were  
147 clustered in distinct groups. Among the divergent genes identified in the comparison  
148 between FL and YD, five genes were significantly downregulated with age and formed a  
149 group clustered by expression levels in young ducks (Cluster No. 1, Table 1; divergent  
150 gene names, descriptions, and cluster numbers are provided in the supplementary tables  
151 1.); two genes showed significant swing expression patterns (i.e., high, low, and high  
152 expression levels over time), rather than consistent levels patterns and formed another  
153 cluster group (Cluster No. 2, Fig 1C.); and the remaining genes showed consistent  
154 expression levels and formed a third cluster group (Cluster No. 3). The divergent genes  
155 identified in the comparison between first-laying and old duck tissue showed a similar  
156 pattern, although Cluster No. 3 in laying ducks showed significant swing expression  
157 levels over time rather than remaining consistent. The genes from Cluster No. 2 in young  
158 ducks showed similar expression levels; however, a pattern of upregulation was identified  
159 in these genes (Fig 1A.). The most suitable clustering schema was derived from old duck  
160 expression data; however, the most suitable clustering schema was recovered by  
161 excluding the gene with the highest expression level in old ducks.

162 Divergent genes identified in the comparison between OD and FL groups could be  
163 clustered into three groups where the ratio of the sum of squares was greater than 80%  
164 regardless of the tissue source (Table 2). The most suitable clustering ratio of the sum of  
165 squares in young duck tissue sources was 91.1%, and genes within each cluster were  
166 significantly downregulated with increasing age. Cluster No. 3 showed the most  
167 remarkable downregulation in both transition phases (young to first-laying, and first-

168 laying to old; Fig 1B). Divergent genes from these comparisons showed high fit to the  
169 three clusters; with most of their RPKMs in the range 20 to 50, and the divergent genes  
170 in clusters with the most genes were expressed at levels 50 to 150 times lower than  
171 expression levels of divergent genes in other clusters. The highest fitful clustering from  
172 young ducks showed significant downregulation across the three life stages from young  
173 ducks to laying ducks, and from laying ducks to old ducks.

174

#### 175 Function analysis of DEGs

176 The DEGs from pairwise group were cluster to biological process, cellular component  
177 and molecular function (Fig 2). According to the GO enriched results, the number of  
178 DEGs showed a significant reduction in the follicular tissues of young ducks, laying  
179 ducks and old ducks. Among these DEGs, young ducks have richment genes expression  
180 with high level, and the most down-regulation genes appear in transition of YD to FL,  
181 and about 300 DEGs were found in cellular process, single organism process, biological  
182 regulation and multicellular organism process (Fig 2A). In these listed process, however,  
183 only about 10 DEGs were clustered to development process with down-regulation  
184 function. A significant difference was found in transition of FL to OD, there are more  
185 than 180 DEGs with reduced expression and more than 30 DEGs with up-regulated  
186 expression are associated with developmental processes (Fig 2B).

187 Further analysis of DEGs by KEGG showed that there was a significant change in the  
188 metabolic pathways during the YD to FL transition, and significant changes in the ovarian  
189 steroids synthesis pathway and steroid hormone biosynthesis pathway during FL to OD  
190 transition (Fig 3). Moreover, the DEGs enriched with the ovarian steroid hormone  
191 synthesis pathway and the steroid hormone biosynthesis pathway are consistent with  
192 DEGs enriched in the development process of GO enrichment. The synthesis of steroid  
193 hormones is closely related to the development of follicles, and also is key biological  
194 processes occurring in the theca cells and granulosa cells of the follicle. Based on the  
195 results of KEGG, there are seven DEGs from FL comparison with OD group (Fig 4).

196 Among of them, six DEGs showed up-regulation in FL, and the highest one expression  
197 level up to 40 times higher than its expression level in OD group. According to the results  
198 of KEGG analysis, the only down-regulation DEGs is SR-B1 (scavenger receptor B type  
199 I) function as cholesterol transmembrane transfer, and its expression level was reduced  
200 by more than twice in the FL group compare to OD group. In the YD group, its expression  
201 level is also 35% higher than that of the FL group, but it did not reach statistically  
202 significant levels. The only one up-regulation DEG in transition of from YD to FL is  
203 EPOX (the member of cytochrome P450 family) play a role of enhancing amino acid  
204 metabolism in theca cell of follicle. The other up-regulation DEGs included StAR,  
205 CYP17, 3 $\beta$ -HSD, CYP19A1 and CYP1B1 that all of them have higher expression level  
206 in YD and FL than in OD.

207

## 208 **DISCUSSION**

209 Some studies have demonstrated that divergent ovarian genes in ducks play a role in  
210 reproduction and cluster into different groups based on their expression levels. Ducks  
211 comprise the second biggest source of poultry eggs and meat; therefore, development of  
212 breeding technologies that improve the quality of duck egg traits is important. Several  
213 studies have reported that divergent genes play a role in the development of follicle  
214 dominance [20] and ovary development [21] in animals, but no studies have reported the  
215 same in birds. Limited knowledge of divergent expression in ducks has prevented the  
216 improvement of reproductive efficiency using molecular breeding technology. However,  
217 reports on duck and goose genome sequences offer a means of exploring differential gene  
218 expression in duck ovaries[22-23]. Using the published duck genome in combination with  
219 transcriptome sequencing, we identified 593 coding genes and 14 noncoding genes that  
220 differed between young and laying ducks, and 518 coding genes and 93 noncoding genes  
221 that differed between laying and old ducks. These results enrich our knowledge of  
222 divergent gene expression in duck ovaries and follicle.

223 Clustering analysis showed that these differential ovarian gene expression levels



224 clustered into three groups with high degrees of suitability. The identified divergent  
225 coding genes from the comparison between laying ducks and young ducks were 593. The  
226 clustering of these genes' by their expression levels in young ducks demonstrates a swing  
227 distribution, in which most of the genes clustered to Group 2 and a few genes clustered  
228 to Groups 1 and 3. Five of the identified genes belonging to Group 1 produce proteins  
229 functioning in defense roles, such as Gallinacin-10 and C factor, to improve young duck  
230 health, and proteins associated with development, such as Matrix Gla [24], and are only  
231 expressed at high levels in young ducks and at no other life stage. The largest clustering  
232 group of divergent genes was Group 2. In this group, mean expression levels of divergent  
233 genes were broadly similar in different life stages, although the expression levels of many  
234 genes coding for functional proteins, such as dehydrogenase and reductase, were affected  
235 by time [25]. Therefore, it is predictable that they would be found in the divergent gene  
236 pool. The third cluster includes two genes, coding for Hemoglobin subunit alpha-A and  
237 RNase, the former of which plays a key role in embryonic transactivation to complete  
238 embryonic development in chickens [26]. According to these cluster results, duck ovaries  
239 undergoing the transition from the young phase to the laying phase receive addition  
240 proteins involved with defense systems; genes related to ovary maturity also show high  
241 expression levels during this transition. Although each phase demonstrated different  
242 clustering groups, most genes remained in the same groups between phases.

243 Steroid hormones are related to the development of sex and secondary sexual  
244 characteristics of animals, and play an important role in maintaining the reproductive  
245 characteristics of birds [27]. The estrogen secreted by the female ovaries is the most  
246 important. Previously studies have shown that it has the effect of promoting female  
247 follicular development and ovulation [28]. Therefore, their synthesis has been the key  
248 research object for researchers to explore the development of animal reproductive organs  
249 and reproductive performance. Previously, there have been specific reports on such  
250 hormone synthesis pathways [29-30], but in the development of avian follicles, especially  
251 in domesticated birds, which genes are regulated by these hormones synthesis have not

252 been reported.

253 In this study, through DEGs clustering and further functional analysis, we found that  
254 most of the genes in the steroid hormone synthesis pathway in duck reproductive organs  
255 have been initiated expression from the youth development stage, such as 3 $\beta$ -HSD, StAR,  
256 etc., but in reproduction stage specific. Activity of expression in these genes is significant  
257 decline after the cessation of follicular maturation has not been reported. In addition, this  
258 study found that the EPOX protein in the ovarian steroid hormone synthesis pathway has  
259 a specific high expression in the reproductive stage during the entire reproductive life of  
260 the duck. EPOX is a member of the cytochrome P450 superfamily of enzymes [31]. The  
261 enzymes are oxygenases which catalyze many reactions involved in the synthesis of  
262 cholesterol, steroids and other lipids. Its high expression in the laying stage of ducks can  
263 provide a large amount of raw materials for the synthesis of reproductive hormones,  
264 ensuring the normal development of follicular development activities. Ovarian follicles  
265 mainly increase and maintain development in the youth stage [32], and follicular  
266 development and maturation activities begin in the laying stage, indicating that EPOX is  
267 a key gene regulating duck follicular development, and its expression can increase with  
268 follicular development in theca and granulosa cells of birds follicle. Moreover, EPOX  
269 have the ability to enhance amino acid metabolism regulates DNA, and indirectly  
270 promoting the expression of other key genes in the steroidogenic synthesis pathway [33],  
271 such as StAR, CYP17 and 3 $\beta$ -HSD, to provide sufficient organic molecules for the  
272 synthesis of estrogen required for duck follicular development. The results of this study  
273 also showed that steroidogenic synthesis pathway have same key DEGs in duck, but the  
274 expression mode of key DEGs are different, such as when the expression level of EPOX  
275 decreased from 100% of the reproductive stage to 2%, the expression of indirectly  
276 regulated gene was also significantly reduced. However, EPOX did not have a significant  
277 effect on the regulation of StAR, CYP17 and 3 $\beta$ -HSD expression levels before laying  
278 eggs.

279 In conclusion, we clustered differentially expressed functional genes and their function

280 analysis, and found that DEGs could be categorized into three groups. The main  
281 functional class of DEGs associated with follicular development is the steroid hormone  
282 synthesis pathway. Further analysis indicated that StAR, CYP17, EPOX, 3 $\beta$ -HSD,  
283 CYP11B1 and CYP19A1 in the steroid synthesis pathway are key factor for maintenance  
284 of follicular maturation and reproductive activity, among which EPOX is a key gene for  
285 time special highly expression during egg laying stage, and other key regulatory genes'  
286 highly expression showed in young and laying stage and lower expression showing with  
287 follicular development stopping.

288

## 289 **ACKNOWLEDGMENTS**

290 We thanks the Zhejiang Zhuowang Agriculture Sci-Tech Limited Co., offering samples  
291 needed in this study and the Annoroad Research Team providing data analysis support.  
292 This study was supported by the Earmarked Fund for National Waterfowl-industry  
293 Technology Research System (number CARS-43-2 and CARS-42-2) and the Zhejiang  
294 Major Scientific and Technological Project of Agricultural (livestock's) Breeding  
295 (2016C02054-13).

296

## 297 **REFERENCES**

- 298 1. Diaz F.J., Anthony K., Halfhill A.N. Early avian follicular development is  
299 characterized by changes in transcripts involved in steroidogenesis, paracrine signaling  
300 and transcription. *Mol Reprod Dev*, 2011, 78: 212–223.
- 301 2. Joseph N.T., Tello J.A., Bedecarrats G.Y., Millar R.P. Reproductive neuropeptides:  
302 prevalence of GnRH and KNDy neural signalling components in a model avian, *Gallus*  
303 *gallus*. *Gen Comp Endocrinol*, 2013, 190: 134–143.
- 304 3. Johnson A.L. The avian ovary and follicle development: some comparative and  
305 practical insights. *Turk J Vet Anim Sci*, 2014, 38: 660-669.
- 306 4. Nimz M., Spitschak M., Schneider F., Furbass R., Vanselow J. Down-regulation of  
307 genes encoding steroidogenic enzymes and hormone receptors in late preovulatory

- 308 follicles of the cow coincides with an accumulation of intrafollicular steroids. *Domest*  
309 *Anim Endocrinol*, 2009, 37(1): 45–54.
- 310 5. Nilsson E.E., Larsen G., Skinner M.K. Roles of Gremlin1 and Gremlin2 in  
311 regulating ovarian primordial to primary follicle transition. *Reproduction*, 2014, 147(6):  
312 865–874.
- 313 6. Johnson P.A., Kent T.R., Urick M.E., Giles J.R. Expression and regulation of anti-  
314 mullerian hormone in an oviparous species, the hen. *Biol Reprod*, 2008, 78:13–19.
- 315 7. Kundu M.C., Wojtusik J., Johnson P.A.. Expression and regulation of Kit ligand in  
316 the ovary of the hen. *Gen Comp Endocrinol*, 2012, 179: 47–52.
- 317 8. Johnson A.L., Woods D.C. Dynamics of avian ovarian follicle development:  
318 cellular mechanisms of granulosa cell differentiation. *Gen Comp Endocrinol*, 2009, 163:  
319 12–17.
- 320 9. Kim D. Regulatory mechanisms of G-protein-coupled receptor (GPCR) signaling  
321 at follicle selection in the hen ovary. *The Pennsylvania State University*, University Park,  
322 PA, USA, 2013.
- 323 10. Vosko A.M., Schroeder A., Loh D.H., Colwell C.S. Vasoactive intestinal peptide  
324 and the mammalian circadian system. *Gen Comp Endocrinol*, 2007, 152: 165–175.
- 325 11. Kosonsiriluk S., Mauro L.J., Chaiworakul V., Chaiseha Y., El Halawani M.E.  
326 Photoreceptive oscillators within neurons of the premammillary nucleus (PMM) and  
327 seasonal reproduction in temperate zone birds. *Gen Comp Endocrinol*, 2013, 190: 149–  
328 155.
- 329 12. Nakane Y., Yoshimura T. Deep brain photoreceptors and a seasonal signal  
330 transduction cascade in birds. *Cell Tissue Res*, 2010, 342: 341–344.
- 331 13. Trapnell C., Pachter L., & Salzberg, S. L. TopHat: Discovering splice junctions  
332 with RN A-Seq. *Bioinformatics*, 2009, 25(9): 1105–1111.
- 333 14. Langmead B., Trapnell C., Pop M., & Salzberg, S. 2C- Ultrafast and memory-  
334 efficient alignment of short DNA sequences to the human genome. *Genome Biol*, 2009,  
335 10(3): R25.

- 336 15. Anders S., Pyl, P.T., and Huber W. HTSeq-A Python framework to work with  
337 high throughput sequencing data. *Bioinformatics*, 2015, 31(2): 166–169.
- 338 16. Wagner G.P., Kin, K., and Lynch V.J. Measurement of mRNA abundance using  
339 RNA-seq data: RPKM measure is inconsistent among samples. *Theory in Biosciences*.  
340 2012, 131(4), 281–285.
- 341 17. Wang L., Feng Z., Wang X., Wang X. and Zhang X. DEGseq: An R package for  
342 identifying differentially expressed genes from RNA-seq data. *Bioinformatics*, 2009, 26:  
343 136–138.
- 344 18. Maere, S., Heymans, K., Kuiper, M. BiNGO: a Cytoscape plugin to assess  
345 overrepresentation of gene ontology categories in biological networks. *Bioinformatics*,  
346 2005, 21, 3448–3449.
- 347 19. Minoru Kanehisa, Yoko Sato, Miho Furumichi, Kanae Morishima, Mao Tanabe;  
348 New approach for understanding genome variations in KEGG, *Nucleic Acids Research*,  
349 2018, gky962.
- 350 20. Yuan W., Bao B., Garverick H.A. Follicular dominance in cattle is associated  
351 with divergent patterns of ovarian gene expression for insulin-like growth factor (IGF)-I,  
352 IGF-II, and IGF binding protein-2 in dominant and subordinate follicles. *Domestic*  
353 *Animal Endocrinology*, 1998, 15(1): 55.
- 354 21. Yan-Jing Y., Yang W., Zhi L., Li Z., Jian-Fang G. Sequential, Divergent and  
355 Cooperative Requirements of Foxl2a and Foxl2b in Ovary Development and  
356 Maintenance of Zebrafish. *Genetics*, 2017, 205(4): 1551-1572.
- 357 22. Huang Y., Li Y., Burt D.W., Chen H., Zhang Y., Qian W., Kim H., Gan S., Zhao  
358 Y., Li J., et al. The duck genome and transcriptome provide insight into an avian influenza  
359 virus reservoir species. *Nature Genetics*, 2013, 45: 776–83.
- 360 23. Lu L., Chen Y., Wang Z., Li X., Chen W., Tao Z., Shen J., Tian Y., Wang D., Li  
361 G., et al. The goose genome sequence leads to insights into the evolution of waterfowl  
362 and susceptibility to fatty liver. *Genome Biology*, 2015, 16: 89.
- 363 24. Elizabeth Correia, Natércia Conceição, M. Leonor Cancela and José A. Belo.

364 Matrix Gla Protein expression pattern in the early avian embryo. *Int. J. Dev. Biol*, 2016,  
365 60: 71-76.

366 25. Seo K.S., Naidansuren P., Kim S.H., Yun S.J., Park J.J., Sim B.W., Park C.W.,  
367 Nanjidsuren T., Kang M.H., Seo H., Ka H., Kim N.H., Hwang S.Y., Yoon J.T.,  
368 Yamanouchi K., Min K.S. Expression of aldo-keto reductase family 1 member C1  
369 (AKR1C1) gene in porcine ovary and uterine endometrium during the estrous cycle and  
370 pregnancy. *Reprod Biol Endocrinol*, 2011, 9: 139.

371 26. Héctor Rincón-Arano, Georgina Guerrero, Christian Valdes-Quezada, Félix  
372 Recillas-Targa. Chicken  $\alpha$ -globin switching depends on autonomous silencing of the  
373 embryonic  $\pi$  globin gene by epigenetics mechanisms. *Journal of Cellular Biochemistry*,  
374 2009, 108: 675–687.

375 27. Frye CA. Steroids, reproductive endocrine function, and affect. A review.  
376 *Minerva Ginecologica*. 2009, 61(6):541-562.

377 28. JOANNE S. RICHARDS, JAMES J. IRELAND, MRINALINI C. RAO,  
378 GREGORY A. BERNATH, A. REES MIDGLEY, LEO E. REICHERT; Ovarian  
379 Follicular Development in the Rat: Hormone Receptor Regulation by Estradiol, Follicle  
380 Stimulating Hormone and Luteinizing Hormone. *Endocrinology*. 1976, 99(6): 1562–1570.

381 29. Young JM, McNeilly AS. Theca: the forgotten cell of the ovarian follicle.  
382 *Reproduction*. 2010, 140(4):489-504.

383 30. Craig ZR, Wang W, Flaws JA. Endocrine-disrupting chemicals in ovarian  
384 function: effects on steroidogenesis, metabolism and nuclear receptor signaling.  
385 *Reproduction*. 2011, 142(5):633-46.

386 31. Ma J, Ramachandran S, Fiedorek FT, Zeldin DC. Mapping of the CYP2J  
387 cytochrome P450 genes to human chromosome 1 and mouse chromosome 4. *Genomics*.  
388 1998, 49 (1): 152–5.

389 32. Johnson Alan L. The avian ovary and follicle development: some comparative  
390 and practical insights. *Turk J Vet Anim Sci*. 2014, 38: 660-669.

391 33. Stocco DM, Wang X, Jo Y, Manna PR. Multiple signaling pathways regulating

392 steroidogenesis and steroidogenic acute regulatory protein expression: more complicated

393 than we thought. *Mol Endocrinol.* 2005, 19(11):2647-59.

394 Table 1. Expression levels in young ducks (YD), first-laying ducks (FL) and old ducks

395 (OD) for genes differentially expressed between FL and YD. “Ratio of SS” indicates the

396 ratio of within-cluster sum of squares to total sum of squares. Different lowercase letters

397 in the same row indicate significant difference at  $P < 0.05$ .

| Cluster source | Cluster No. | Number of divergent genes | Ratio of SS | YD                             | FL                            | OD                             |
|----------------|-------------|---------------------------|-------------|--------------------------------|-------------------------------|--------------------------------|
| Young ducks    | 1           | 5                         |             | 559.32 <sup>a</sup> ± 263.946  | 119.65 <sup>b</sup> ± 105.418 | 178.42 <sup>b</sup> ± 184.657  |
|                | 2           | 586                       | 84.4%       | 12.65 ± 25.233                 | 11.06 ± 20.629                | 11.46 ± 25.191                 |
|                | 3           | 2                         |             | 1979.20 <sup>a</sup> ± 282.783 | 290.44 <sup>a</sup> ± 325.376 | 927.7 <sup>ab</sup> ± 1173.049 |
| Laying ducks   | 1           | 3                         |             | 1185.83 ± 919.616              | 326.48 ± 168.034              | 821.78 ± 818.713               |
|                | 2           | 53                        | 62.4%       | 95.23 ± 246.775                | 65.23 ± 31.433                | 59.6 ± 59.423                  |
|                | 3           | 537                       |             | 10.36 <sup>a</sup> ± 33.695    | 6 <sup>b</sup> ± 8.503        | 7.15 <sup>a</sup> ± 11.844     |
| Old ducks      | 1           | 1                         |             | 2179.15                        | 520.51                        | 1757.17                        |
|                | 2           | 9                         | 93.6%       | 226.29 ± 234.107               | 120.53 ± 59.735               | 214.33 ± 122.279               |
|                | 3           | 583                       |             | 17.07 ± 83.622                 | 10.38 ± 18.869                | 9.91 ± 16.162                  |

398

399

400

401

402

403

404 Table 2. Expression levels in young ducks (YD), first-laying ducks (FL) and old ducks  
 405 (OD) for genes differentially expressed between FL and OD. “Ratio of SS” indicates the  
 406 ratio of within-cluster sum of squares to total sum of squares. Different lowercase letters  
 407 in the same row indicate significant difference at  $P < 0.05$ .

| Cluster source | Cluster No. | Number of divergent genes | Ratio of SS | YD                              | FL                               | OD                             |
|----------------|-------------|---------------------------|-------------|---------------------------------|----------------------------------|--------------------------------|
| Young ducks    | 1           | 3                         |             | 2143.02 ± 1124.465              | 2070.87 ± 1174.042               | 446.7 ± 447.237                |
|                | 2           | 513                       | 91.1%       | 40.78 <sup>A</sup> ± 89.736     | 40.55 <sup>A</sup> ± 104.31      | 24.74 <sup>B</sup> ± 87.061    |
|                | 3           | 2                         |             | 6427.87 <sup>A</sup> ± 156.381  | 1307.22 <sup>AB</sup> ± 1506.741 | 54.15 <sup>B</sup> ± 70.125    |
| Laying ducks   | 1           | 508                       |             | 48.37 <sup>a</sup> ± 296.671    | 31.58 <sup>a</sup> ± 54.516      | 22.1 <sup>b</sup> ± 82.223     |
|                | 2           | 8                         | 81.4%       | 743.71 <sup>Aba</sup> ± 594.294 | 977.54 <sup>Aa</sup> ± 359.135   | 239.49 <sup>Bb</sup> ± 191.762 |
|                | 3           | 2                         |             | 4841.29 ± 2087.38               | 2884.43 ± 723.775                | 499.51 ± 559.712               |
| Old ducks      | 1           | 2                         |             | 1791.05 ± 2226.316              | 1896.02 ± 2121.604               | 1188.73 ± 415                  |
|                | 2           | 501                       | 83.4%       | 61.77 <sup>A</sup> ± 412.346    | 39.82 <sup>B</sup> ± 142.274     | 13.78 <sup>C</sup> ± 25.909    |
|                | 3           | 15                        |             | 378.42 ± 499.67                 | 392.58 ± 447.73                  | 323.99 ± 119.69                |

408

409

410



411

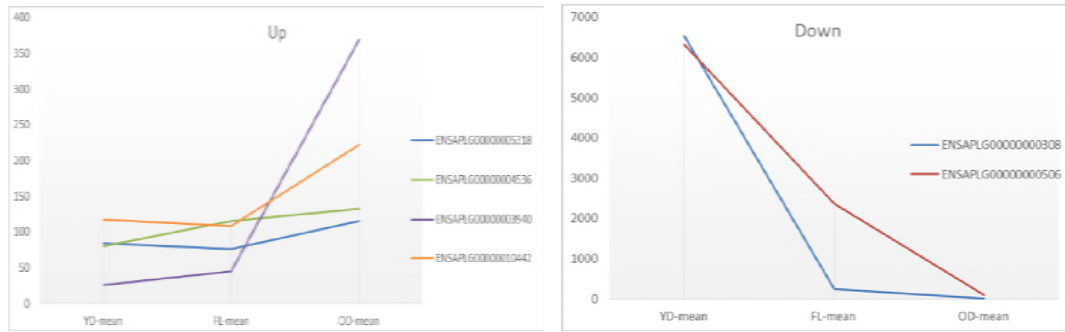

412

413

A.

B.

414

415

C.

416 **Fig 1. The DEGs exhibit either upregulation, downregulation, swing**  
417 **patterns between life stages.**

418 (A) The DEGs with upregulation profile in duck life cycle. (B) The DEGs with  
419 downregulation profile in duck life cycle. (C) The DEGs with swing patterns in  
420 duck life cycle.

421

422

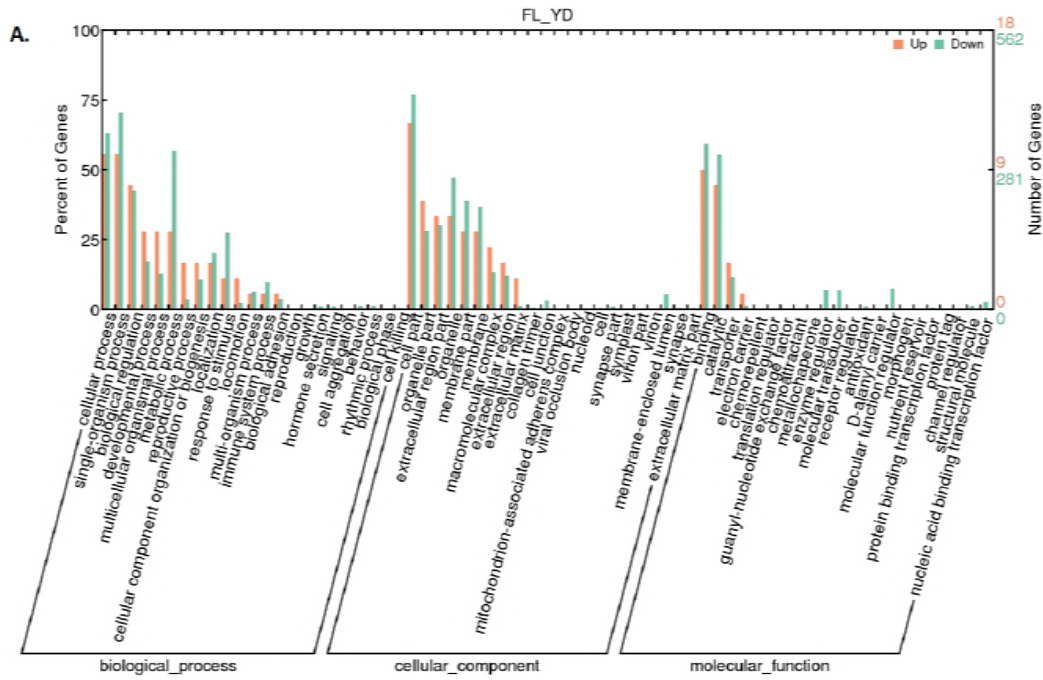

423

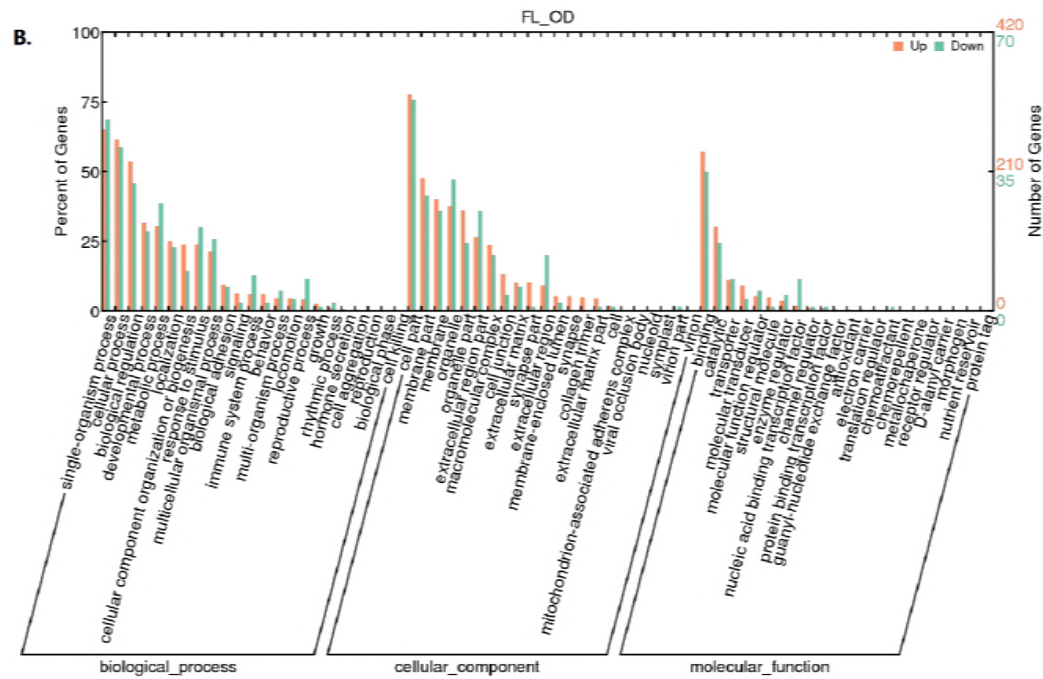

424

425 **Fig 2. The results of analysis of DEGs by GO in two different transition.**

426 (A) The GO analysis result of DEGs from the transition from YD to FL. (B) The

427 GO analysis result of DEGs from the transition from FL to OD.

428

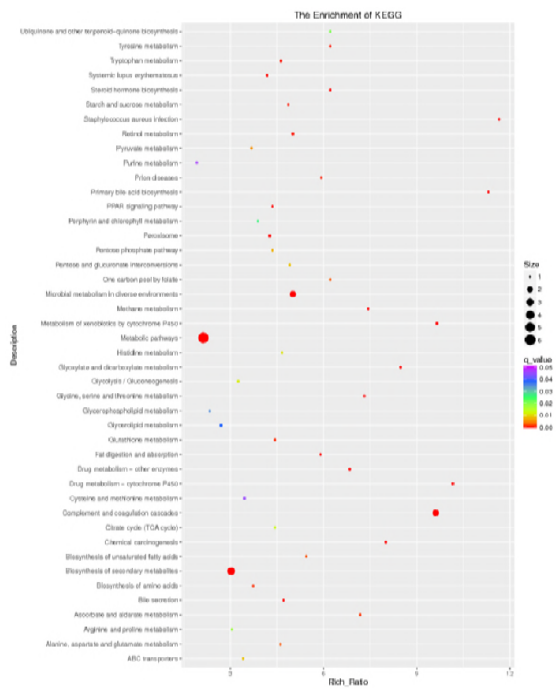

429

430

A.

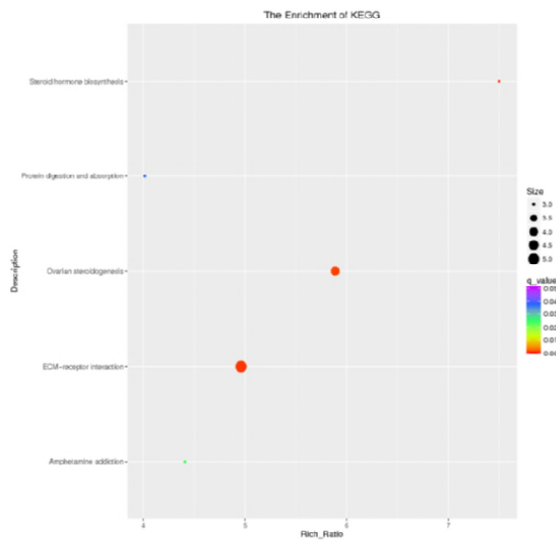

431

432

B.

433 **Fig 3. The results of analysis of DEGs by KEGG in two different transition.**

434 (A) The KEGG analyzed result of DEGs from the transition from YD to FL. (B)

435 The KEGG analyzed result of DEGs from the transition from FL to OD.

436

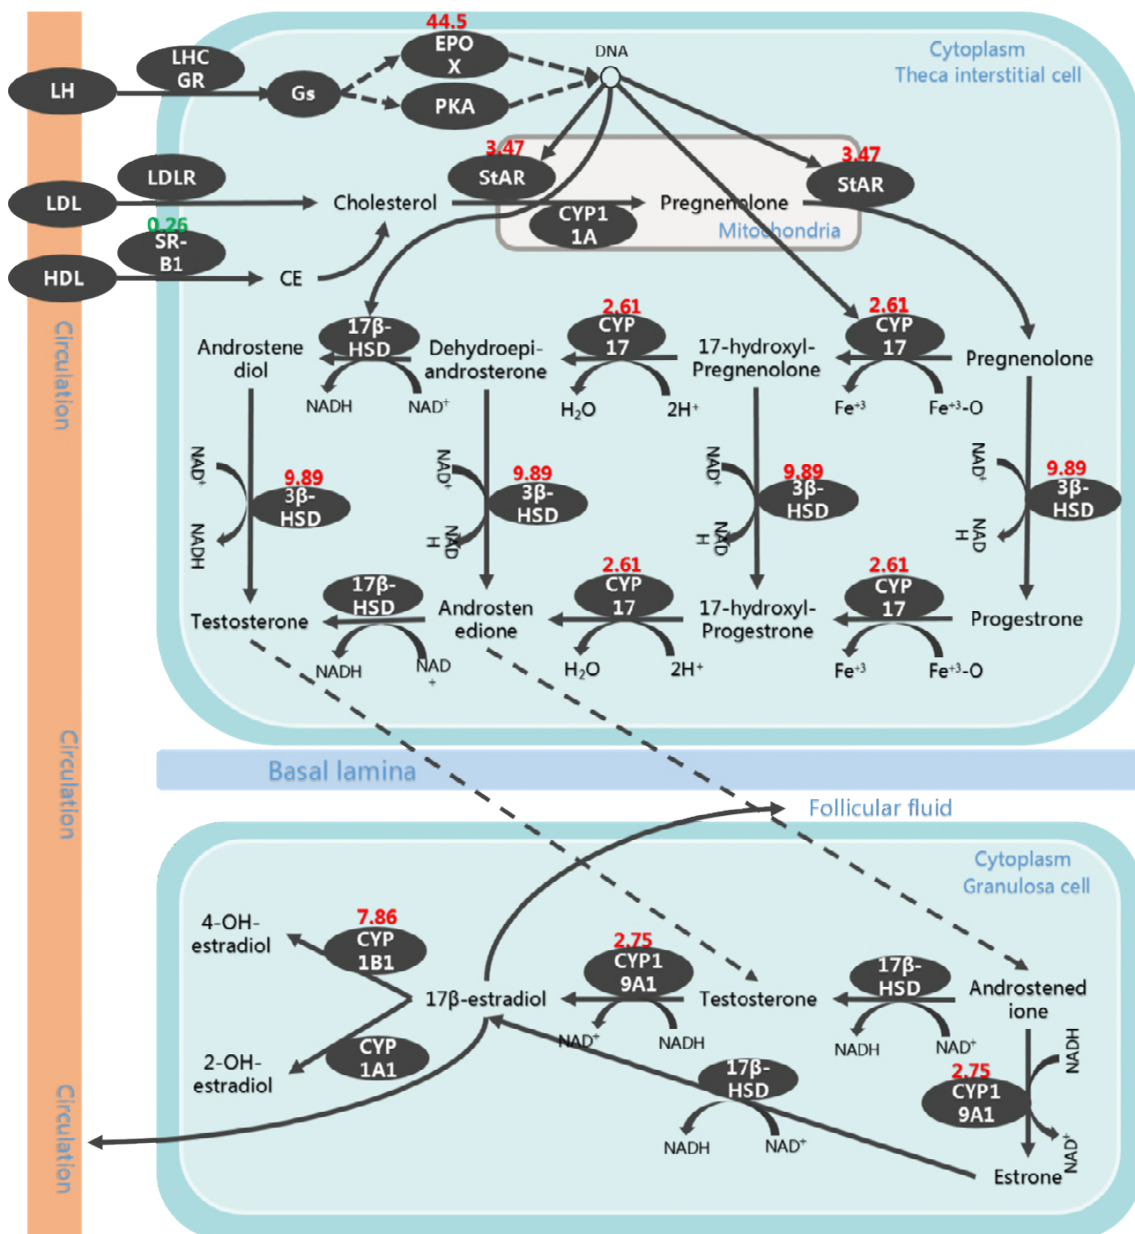

437

438 **Fig 4. The change of steroid hormone biosynthesis pathway in transition**  
 439 **from FL to OD.**

440 Note: The red numbers were DEGs' up-regulated expression folds by FL vs OD.  
 441 down-regulated DEGs noted with green color.

442
